# Supplementary material for: Beach-face slope dataset for Australia
Source: Copernicus journal article supplement (doi:10.5194/essd-2021-388), 2021-11-18
Supplement: Supplementary file 1 [file essd-2021-388-supplement.pdf]

## Supplementary Information for: Beach-face slope dataset for Australia

Kilian Vos<sup>1</sup>, Wen Deng<sup>1</sup>, Mitchell D. Harley<sup>1</sup>, Ian L. Turner<sup>1</sup>, Kristen D. Splinter<sup>1</sup>

<sup>1</sup>Water Research Laboratory, School of Civil and Environmental Engineering, UNSW Sydney, 110 King Street, Manly Vale, NSW 2093, Australia

The Supplementary Information contains 4 figures:

- Supplementary Figure 1: Mean Spring Tidal Range and Significant Wave Height around Australia
- Supplementary Figure 2: Primary and Secondary Sediment Compartments
- Supplementary Figure 3: Beach-face slope distributions in the Primary Sediment Compartments
- Supplementary Figure 4: Beach-face slope distributions in the Secondary Sediment Compartments

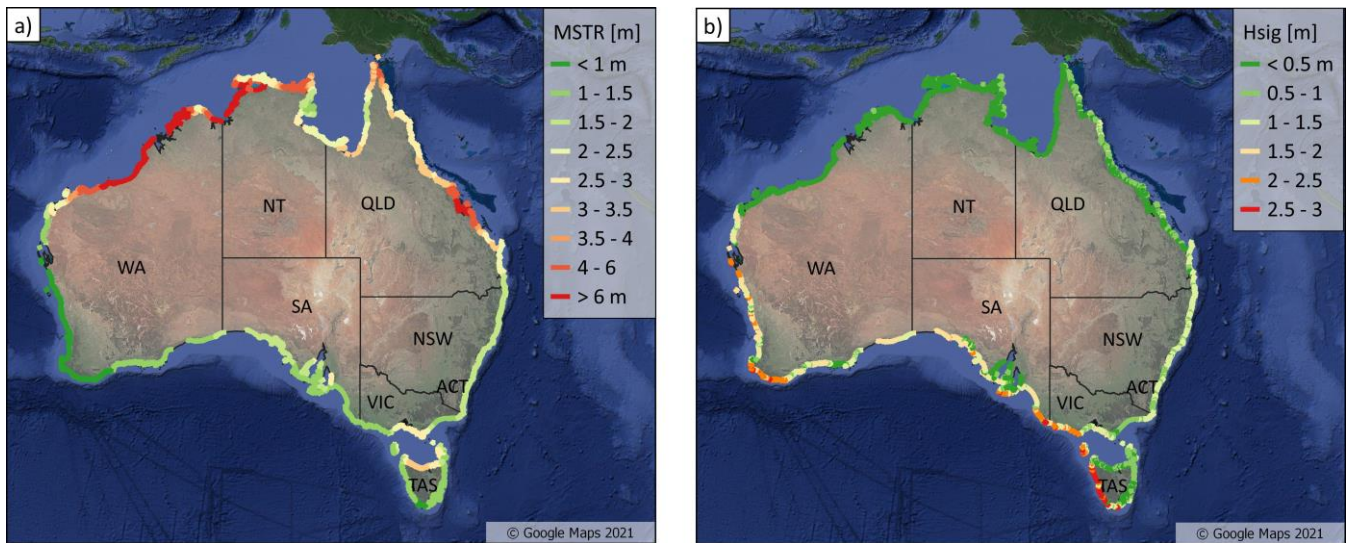

**Supplementary Figure 1.** a) Mean Spring Tide Range (MSTR) around Australia from FES2014 Global tide model (Carrere et al., 2016). b) Median deep-water Significant Wave Height (Hs) around Australia from CAWCR Wave Hindcast (Smith et al., 2021).

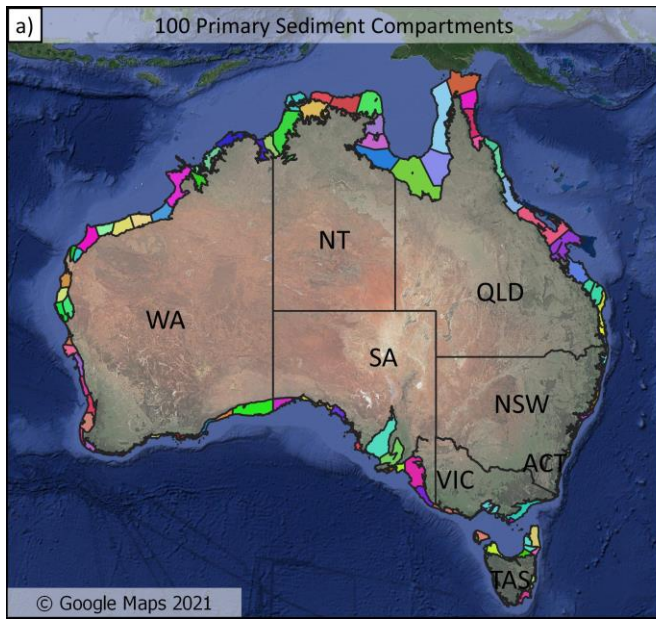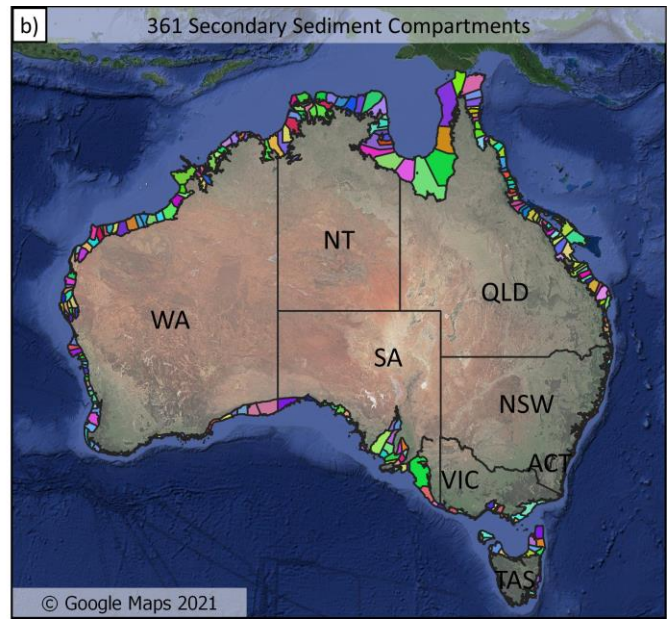

**Supplementary Figure 2.** a) 100 primary sediment compartments and b) 361 secondary sediment compartments, as defined in the National Sediment Compartment Framework (Thom et al., 2018).

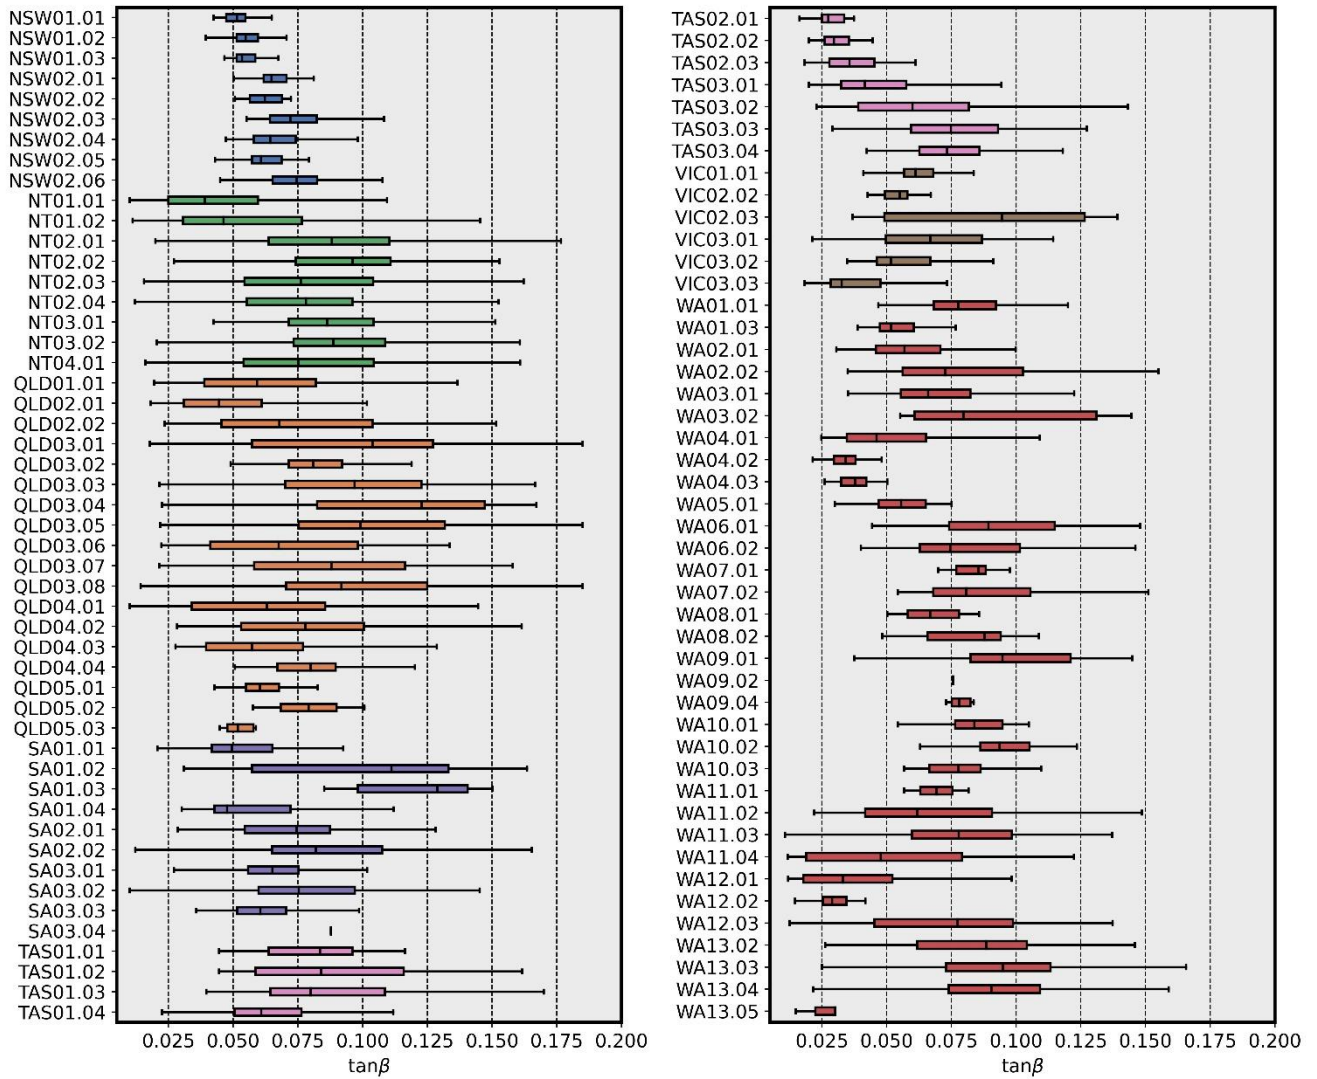

**Supplementary Figure 3.** Distribution of beach-face slopes across the 100 primary sediment compartments as defined in the National Sediment Compartment Framework (Thom et al., 2018). The spatial extent of each compartment can be found with the corresponding IDs in the primary sediment compartment geospatial layer included in this dataset.

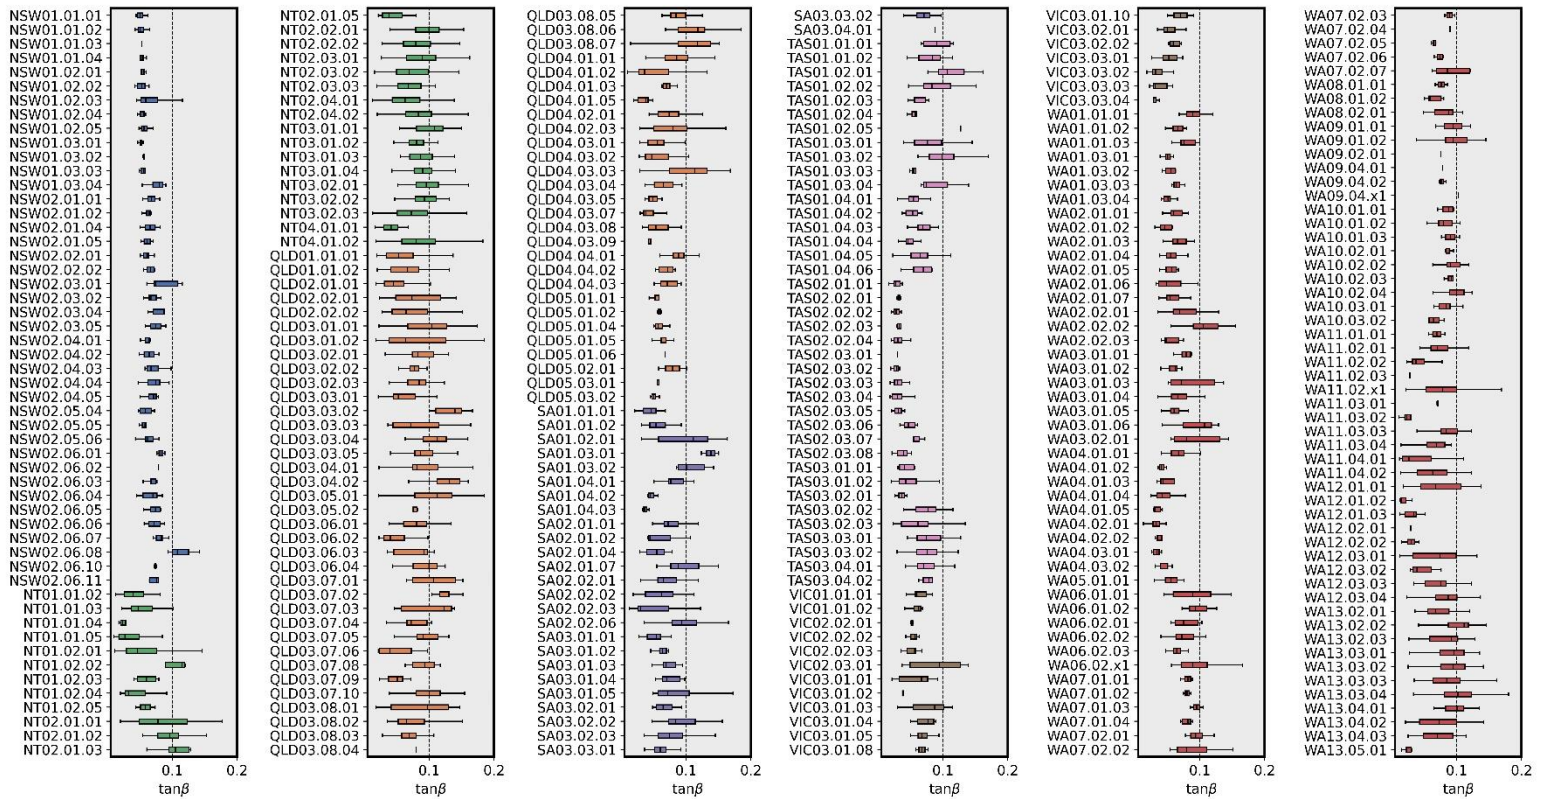

**Supplementary Figure 4.** Distribution of beach-face slopes across the 361 secondary sediment compartments as defined in the National Sediment Compartment Framework (Thom et al., 2018). The spatial extent of each compartment can be found with the corresponding IDs in the primary sediment compartment geospatial layer included in this dataset.
